# Supplementary material
Source: publisher figshare collection journal article supplement (https://acs.figshare.com/ndownloader/files/4494343)
Supplement: Supplementary file 1 [file 4494343]

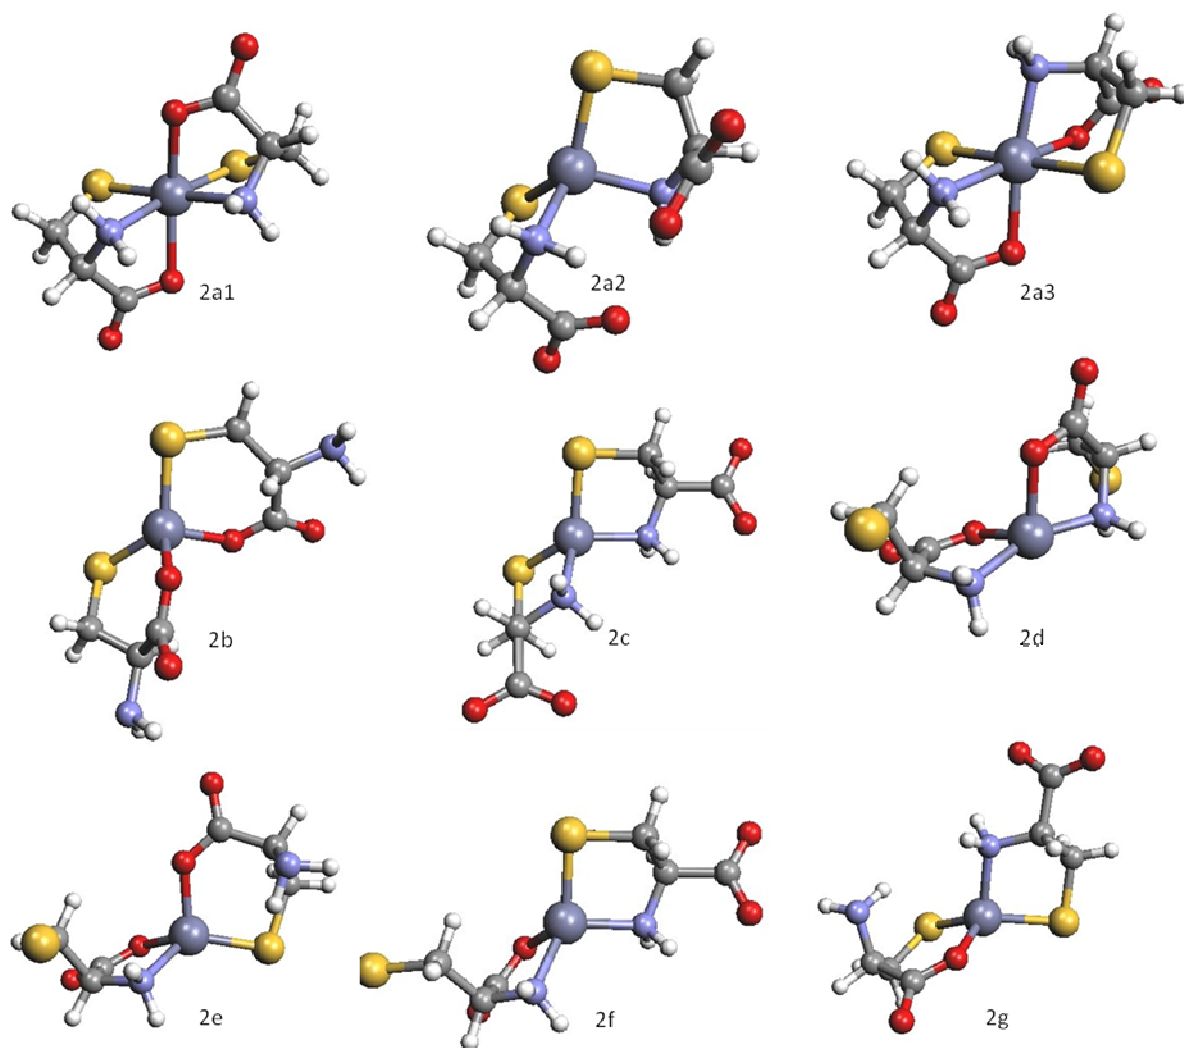

**Figure S1.** Optimized (BP86/TZVP+COSMO) structures for the studied  $\text{ZnCys}_2$  complexes. If the initial binding mode differs from the final one, the previous is shown in parentheses.

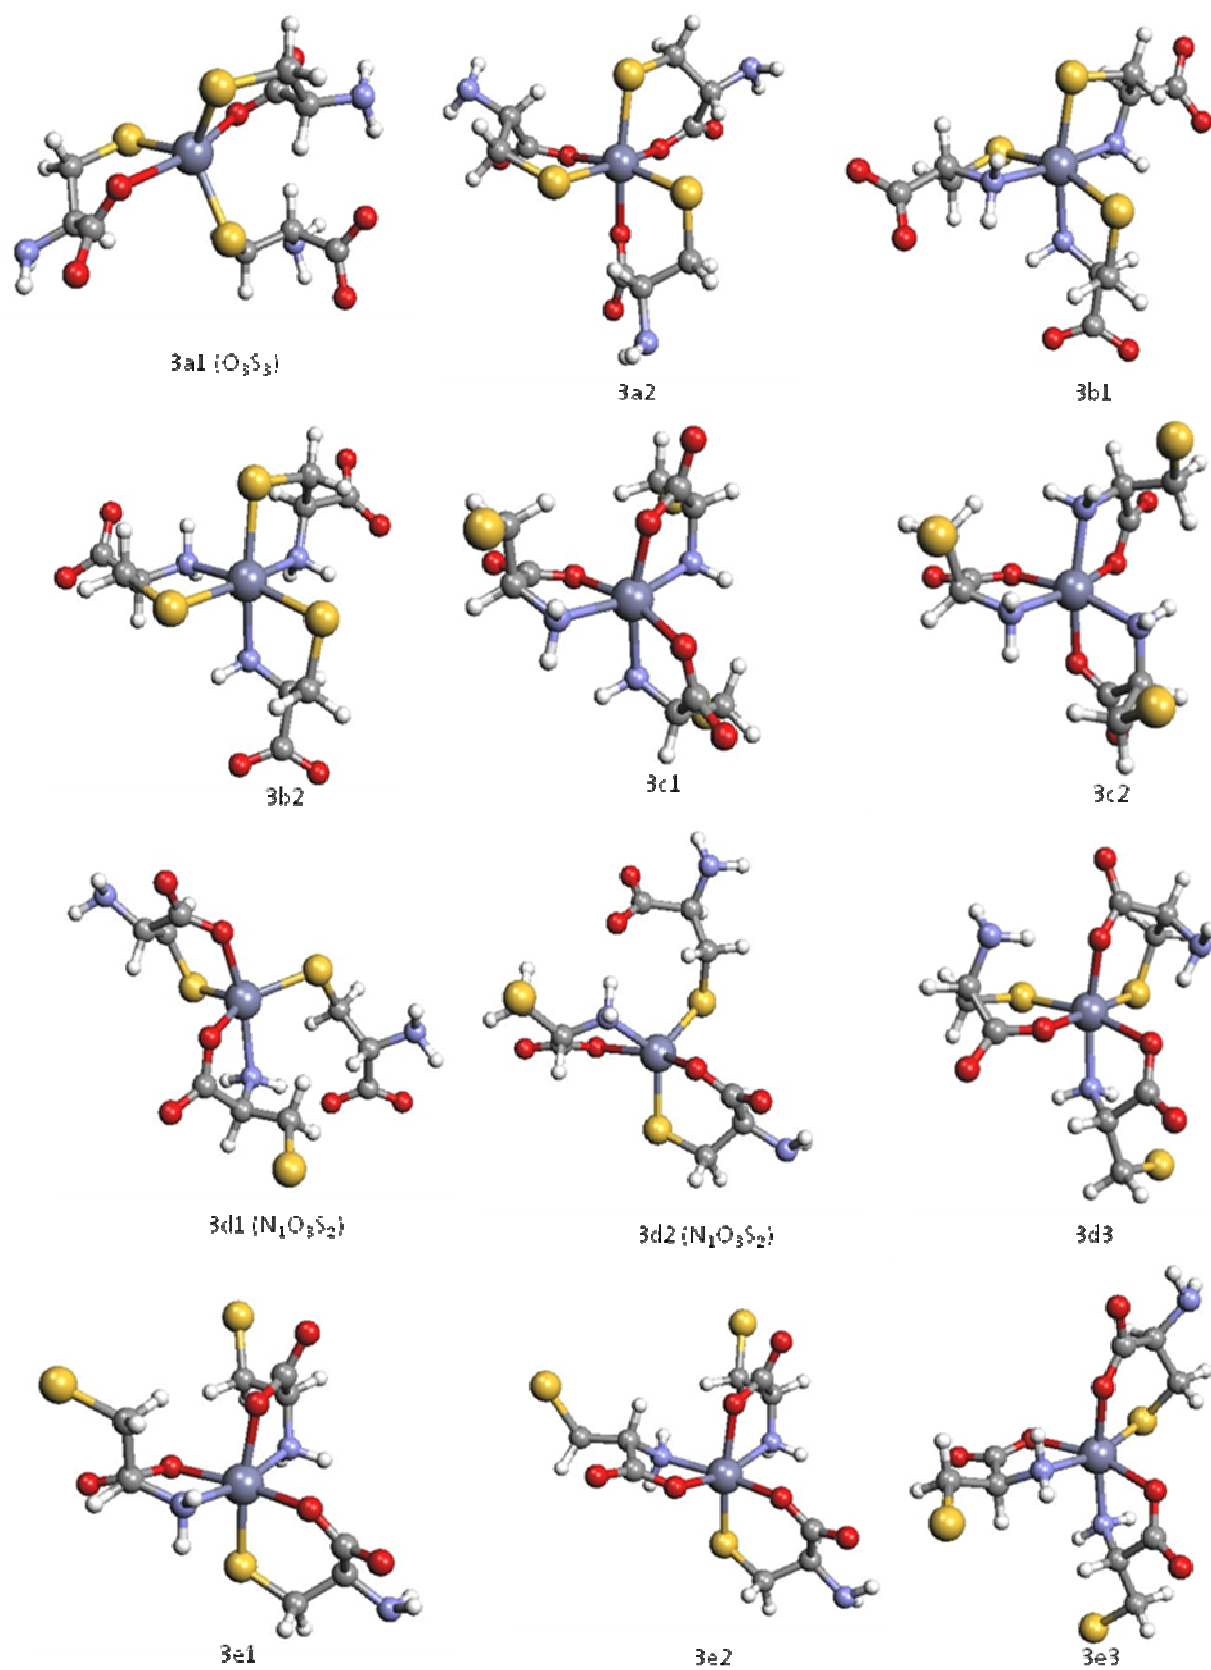

**Figure S2.** Optimized (BP86/TZVP+COSMO) structures for the studied  $ZnCys_3$  complexes. If the initial binding mode differs from the final one, the previous is shown in parentheses.

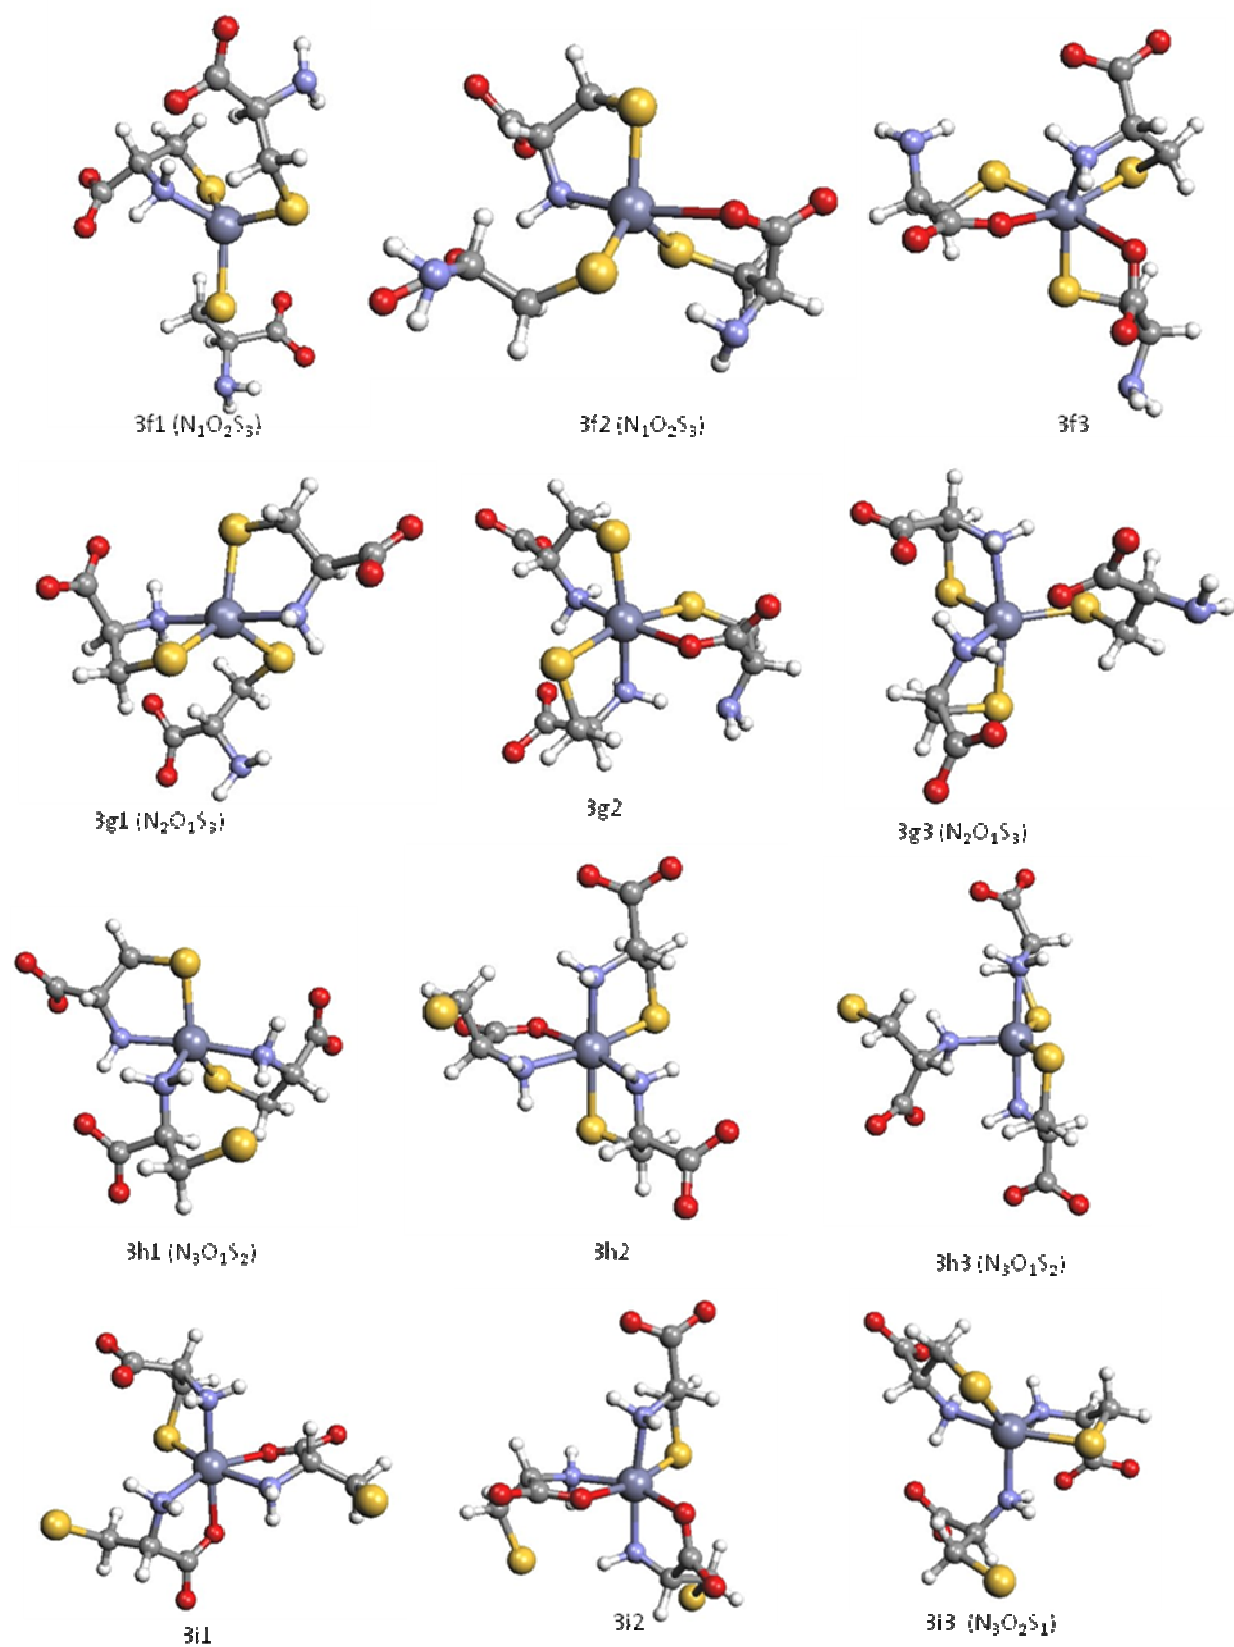

**Figure 2.** Continuing

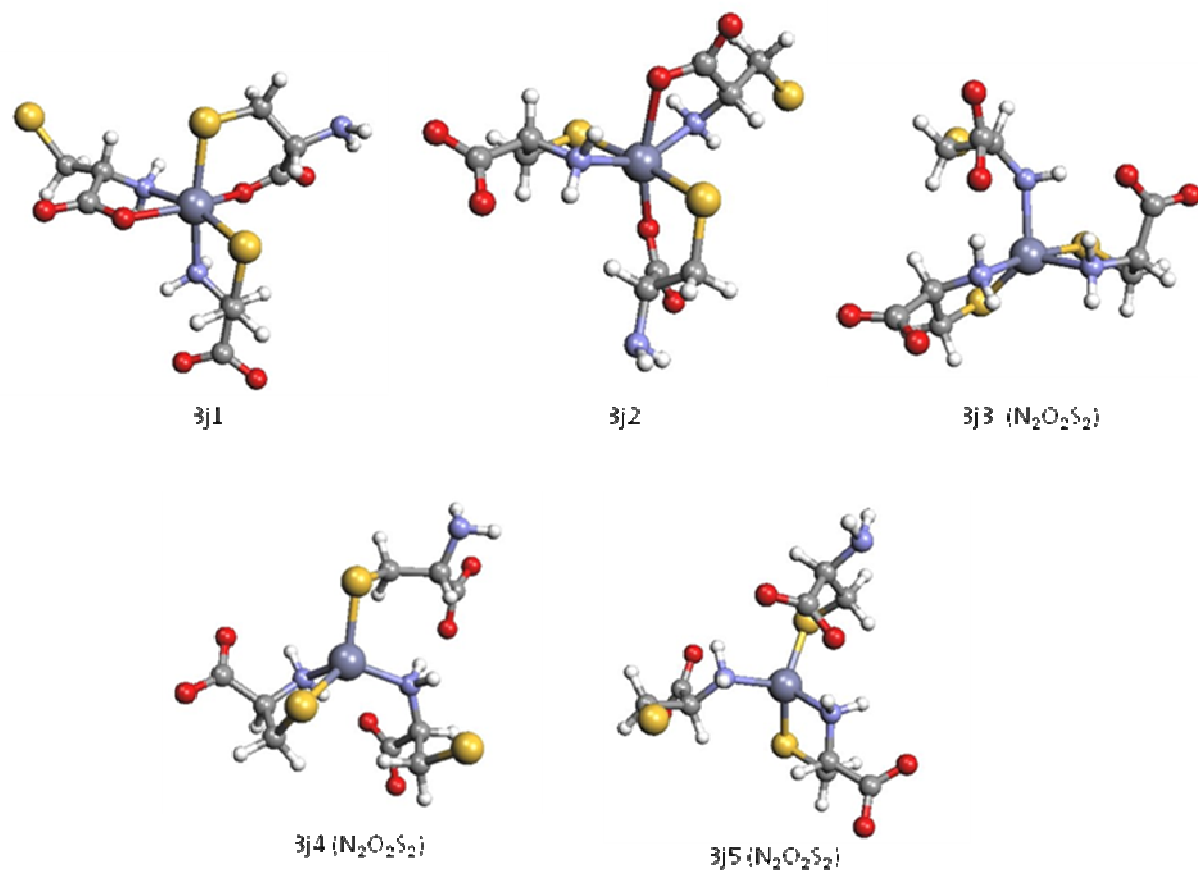

**Figure 2.** Continuing
